# Supplementary material
Source: Research Square preprint supplement (doi:10.21203/rs.3.rs-8101764/v1)
Supplement: Supplementary file 1 [file a2bd1a2211195f0955bddf2f.docx]

Supplement Table 1 Data on different system organ classes (SOCs)

Supplement Table 1A Rivaroxaban Only and Rivaroxaban + Clopidogrel

| System Organ Classes | Rivaroxaban Only | | | | | | Rivaroxaban + Clopidogrel | | | | | |
| --- | --- | --- | --- | --- | --- | --- | --- | --- | --- | --- | --- | --- |
| SOCs | Case Reports | ROR (95% CI) | PRR (95% CI) | chisq | IC(IC025) | EBGM(EBGM05) | Case Reports | ROR (95% CI) | PRR (95% CI) | chisq | IC(IC025) | EBGM(EBGM05) |
| vascular disorders | 23992 | 4.87(4.8, 4.93) | 4.49(4.4, 4.58) | 64972.67 | 2.14(2.12) | 4.41(4.36) | 1004 | 3.39(3.18, 3.62) | 3.22(3.04, 3.42) | 1569.63 | 1.69(1.59) | 3.22(3.05) |
| gastrointestinal disorders | 46216 | 2.39(2.37, 2.42) | 2.13(2.13, 2.13) | 30040.76 | 1.08(1.07) | 2.12(2.1) | 3655 | 3.6(3.46, 3.74) | 2.92(2.86, 2.98) | 5067.9 | 1.55(1.49) | 2.92(2.83) |
| renal and urinary disorders | 10623 | 2.29(2.25, 2.34) | 2.23(2.19, 2.27) | 7297.69 | 1.15(1.12) | 2.22(2.18) | 701 | 2.64(2.45, 2.85) | 2.56(2.37, 2.77) | 676.93 | 1.35(1.24) | 2.56(2.4) |
| blood and lymphatic system disorders | 7288 | 1.74(1.7, 1.78) | 1.72(1.69, 1.75) | 2210.96 | 0.78(0.74) | 1.71(1.68) | 661 | 2.8(2.59, 3.02) | 2.71(2.51, 2.93) | 726.04 | 1.44(1.33) | 2.71(2.54) |
| respiratory, thoracic and mediastinal disorders | 18124 | 1.54(1.51, 1.56) | 1.5(1.47, 1.53) | 3112.34 | 0.58(0.56) | 1.49(1.47) | 1065 | 1.57(1.48, 1.67) | 1.53(1.44, 1.62) | 205.67 | 0.61(0.52) | 1.53(1.45) |
| nervous system disorders | 31024 | 1.51(1.49, 1.53) | 1.45(1.42, 1.48) | 4643.15 | 0.53(0.51) | 1.44(1.43) | 1394 | 1.15(1.08, 1.21) | 1.13(1.07, 1.2) | 23.17 | 0.18(0.1) | 1.13(1.08) |
| cardiac disorders | 8609 | 1.36(1.33, 1.39) | 1.34(1.31, 1.37) | 770.23 | 0.42(0.39) | 1.34(1.32) | 831 | 2.34(2.18, 2.51) | 2.26(2.13, 2.4) | 598.4 | 1.18(1.07) | 2.26(2.13) |
| reproductive system and breast disorders | 2824 | 1.32(1.28, 1.38) | 1.32(1.27, 1.37) | 220.91 | 0.4(0.35) | 1.32(1.28) | 86 | 0.7(0.57, 0.86) | 0.7(0.56, 0.87) | 11.09 | -0.51(-0.82) | 0.7(0.59) |
| injury, poisoning and procedural complications | 24185 | 1(0.99, 1.02) | 1(0.98, 1.02) | 0.13 | 0(-0.02) | 1(0.99) | 1460 | 1.06(1.01, 1.12) | 1.06(1.02, 1.1) | 4.74 | 0.08(0) | 1.06(1.01) |
| congenital, familial and genetic disorders | 790 | 0.99(0.93, 1.07) | 0.99(0.92, 1.07) | 0.03 | -0.01(-0.11) | 0.99(0.94) | 85 | 1.87(1.51, 2.32) | 1.87(1.51, 2.32) | 34.21 | 0.9(0.59) | 1.86(1.56) |
| investigations | 12923 | 0.84(0.83, 0.86) | 0.85(0.83, 0.87) | 366.82 | -0.23(-0.26) | 0.85(0.84) | 628 | 0.71(0.65, 0.77) | 0.72(0.67, 0.78) | 72.52 | -0.47(-0.59) | 0.72(0.67) |
| hepatobiliary disorders | 1663 | 0.73(0.7, 0.77) | 0.74(0.71, 0.77) | 157.33 | -0.44(-0.51) | 0.74(0.71) | 65 | 0.5(0.39, 0.64) | 0.5(0.4, 0.63) | 32.21 | -0.99(-1.34) | 0.5(0.41) |
| ear and labyrinth disorders | 812 | 0.73(0.68, 0.79) | 0.73(0.67, 0.79) | 78.59 | -0.44(-0.54) | 0.73(0.69) | 22 | 0.35(0.23, 0.53) | 0.35(0.23, 0.53) | 27.12 | -1.53(-2.12) | 0.35(0.24) |
| skin and subcutaneous tissue disorders | 8428 | 0.59(0.58, 0.6) | 0.61(0.6, 0.62) | 2290.36 | -0.72(-0.75) | 0.61(0.6) | 303 | 0.37(0.33, 0.41) | 0.38(0.34, 0.43) | 323.96 | -1.39(-1.56) | 0.38(0.35) |
| eye disorders | 2909 | 0.56(0.54, 0.58) | 0.57(0.55, 0.59) | 966.51 | -0.81(-0.86) | 0.57(0.55) | 118 | 0.4(0.33, 0.48) | 0.4(0.34, 0.48) | 106.18 | -1.31(-1.57) | 0.4(0.35) |
| musculoskeletal and connective tissue disorders | 7839 | 0.56(0.54, 0.57) | 0.57(0.56, 0.58) | 2668.59 | -0.81(-0.84) | 0.57(0.56) | 276 | 0.34(0.3, 0.38) | 0.35(0.31, 0.39) | 349.76 | -1.51(-1.68) | 0.35(0.32) |
| endocrine disorders | 296 | 0.46(0.41, 0.51) | 0.46(0.41, 0.52) | 190.05 | -1.12(-1.29) | 0.46(0.42) | 14 | 0.38(0.22, 0.64) | 0.38(0.22, 0.65) | 14.29 | -1.4(-2.13) | 0.38(0.24) |
| general disorders and administration site conditions | 22387 | 0.44(0.44, 0.45) | 0.49(0.48, 0.5) | 14162.83 | -1.01(-1.03) | 0.5(0.49) | 1133 | 0.39(0.37, 0.41) | 0.44(0.41, 0.47) | 1003.95 | -1.19(-1.28) | 0.44(0.42) |
| metabolism and nutrition disorders | 2291 | 0.42(0.4, 0.43) | 0.42(0.4, 0.44) | 1860.62 | -1.24(-1.3) | 0.42(0.41) | 132 | 0.42(0.35, 0.5) | 0.42(0.35, 0.5) | 105.28 | -1.24(-1.48) | 0.42(0.37) |
| infections and infestations | 5337 | 0.38(0.37, 0.39) | 0.39(0.38, 0.4) | 5290.99 | -1.34(-1.38) | 0.39(0.39) | 218 | 0.27(0.24, 0.31) | 0.28(0.24, 0.32) | 425.01 | -1.83(-2.02) | 0.28(0.25) |
| neoplasms benign, malignant and unspecified (incl cysts and polyps) | 2411 | 0.33(0.32, 0.34) | 0.34(0.33, 0.35) | 3255.55 | -1.57(-1.63) | 0.34(0.33) | 53 | 0.13(0.1, 0.16) | 0.13(0.1, 0.17) | 320.25 | -2.95(-3.34) | 0.13(0.1) |
| psychiatric disorders | 3504 | 0.23(0.22, 0.24) | 0.24(0.23, 0.25) | 8998.57 | -2.06(-2.11) | 0.24(0.23) | 119 | 0.14(0.11, 0.16) | 0.14(0.12, 0.17) | 653.88 | -2.81(-3.07) | 0.14(0.12) |
| immune system disorders | 596 | 0.2(0.19, 0.22) | 0.21(0.19, 0.23) | 1838.98 | -2.27(-2.39) | 0.21(0.19) | 30 | 0.18(0.13, 0.26) | 0.18(0.13, 0.26) | 111.64 | -2.46(-2.97) | 0.18(0.13) |
| pregnancy, puerperium and perinatal conditions | 116 | 0.11(0.09, 0.13) | 0.11(0.09, 0.13) | 866.81 | -3.22(-3.48) | 0.11(0.09) |  |  |  |  |  |  |

Supplement Table 1B Rivaroxaban + Aspirin and Rivaroxaban + Clopidogrel +Aspirin

| System Organ Classes | Rivaroxaban + Aspirin | | | | | | Rivaroxaban + Clopidogrel +Aspirin | | | | | |
| --- | --- | --- | --- | --- | --- | --- | --- | --- | --- | --- | --- | --- |
| SOCs | Case Reports | ROR (95% CI) | PRR (95% CI) | chisq | IC(IC025) | EBGM(EBGM05) | Case Reports | ROR (95% CI) | PRR (95% CI) | chisq | IC(IC025) | EBGM(EBGM05) |
| vascular disorders | 4505 | 3.37(3.27, 3.48) | 3.2(3.14, 3.26) | 6950.46 | 1.68(1.63) | 3.19(3.11) | 837 | 3.41(3.18, 3.66) | 3.24(3.05, 3.44) | 1324.84 | 1.7(1.59) | 3.24(3.05) |
| gastrointestinal disorders | 21518 | 5.26(5.18, 5.35) | 3.82(3.75, 3.9) | 48867.34 | 1.93(1.9) | 3.8(3.75) | 3764 | 4.89(4.71, 5.09) | 3.63(3.56, 3.7) | 7879.59 | 1.86(1.81) | 3.63(3.51) |
| renal and urinary disorders | 4444 | 3.79(3.68, 3.91) | 3.6(3.53, 3.67) | 8451.87 | 1.84(1.8) | 3.58(3.49) | 737 | 3.4(3.15, 3.66) | 3.25(3, 3.52) | 1166.78 | 1.7(1.59) | 3.24(3.05) |
| blood and lymphatic system disorders | 2451 | 2.28(2.19, 2.37) | 2.23(2.14, 2.32) | 1680.09 | 1.15(1.09) | 2.22(2.15) | 452 | 2.29(2.08, 2.51) | 2.24(2.03, 2.47) | 314.9 | 1.16(1.03) | 2.24(2.07) |
| respiratory, thoracic and mediastinal disorders | 4680 | 1.53(1.48, 1.57) | 1.49(1.46, 1.52) | 786.46 | 0.57(0.53) | 1.49(1.45) | 945 | 1.7(1.59, 1.81) | 1.64(1.55, 1.74) | 247.75 | 0.71(0.62) | 1.64(1.55) |
| nervous system disorders | 5904 | 1.07(1.04, 1.09) | 1.06(1.04, 1.08) | 21.65 | 0.08(0.04) | 1.06(1.04) | 916 | 0.89(0.83, 0.95) | 0.9(0.85, 0.95) | 11.81 | -0.16(-0.25) | 0.9(0.85) |
| cardiac disorders | 2264 | 1.37(1.32, 1.43) | 1.36(1.31, 1.41) | 222.78 | 0.44(0.38) | 1.36(1.31) | 717 | 2.44(2.26, 2.63) | 2.35(2.17, 2.54) | 572.67 | 1.23(1.13) | 2.35(2.21) |
| reproductive system and breast disorders | 644 | 1.16(1.08, 1.26) | 1.16(1.07, 1.25) | 14.49 | 0.22(0.1) | 1.16(1.09) | 77 | 0.76(0.6, 0.95) | 0.76(0.61, 0.94) | 6.03 | -0.4(-0.72) | 0.76(0.63) |
| injury, poisoning and procedural complications | 6255 | 1(0.97, 1.03) | 1(0.98, 1.02) | 0 | 0(-0.04) | 1(0.98) | 1206 | 1.06(1, 1.12) | 1.05(0.99, 1.11) | 3.54 | 0.07(-0.01) | 1.05(1) |
| congenital, familial and genetic disorders | 596 | 2.92(2.69, 3.16) | 2.9(2.68, 3.14) | 741.35 | 1.53(1.42) | 2.89(2.7) | 111 | 2.96(2.46, 3.57) | 2.94(2.46, 3.51) | 142.63 | 1.56(1.29) | 2.94(2.51) |
| investigations | 2126 | 0.52(0.5, 0.55) | 0.54(0.52, 0.56) | 891.35 | -0.89(-0.95) | 0.54(0.52) | 409 | 0.55(0.5, 0.61) | 0.57(0.52, 0.63) | 144.5 | -0.82(-0.96) | 0.57(0.52) |
| hepatobiliary disorders | 220 | 0.37(0.33, 0.43) | 0.38(0.33, 0.44) | 229.38 | -1.41(-1.6) | 0.38(0.34) | 59 | 0.55(0.43, 0.71) | 0.55(0.43, 0.71) | 21.74 | -0.86(-1.22) | 0.55(0.45) |
| ear and labyrinth disorders | 99 | 0.34(0.28, 0.42) | 0.35(0.29, 0.43) | 123.34 | -1.53(-1.82) | 0.35(0.29) | 16 | 0.3(0.19, 0.5) | 0.3(0.18, 0.49) | 25.47 | -1.71(-2.4) | 0.3(0.2) |
| skin and subcutaneous tissue disorders | 966 | 0.26(0.24, 0.27) | 0.27(0.25, 0.29) | 2045.39 | -1.9(-1.99) | 0.27(0.25) | 158 | 0.23(0.2, 0.27) | 0.24(0.21, 0.28) | 404.29 | -2.06(-2.29) | 0.24(0.21) |
| eye disorders | 466 | 0.35(0.32, 0.38) | 0.35(0.32, 0.39) | 566.38 | -1.5(-1.64) | 0.35(0.33) | 89 | 0.36(0.29, 0.45) | 0.37(0.3, 0.46) | 98.9 | -1.44(-1.74) | 0.37(0.31) |
| musculoskeletal and connective tissue disorders | 1053 | 0.28(0.27, 0.3) | 0.3(0.28, 0.32) | 1862.19 | -1.75(-1.84) | 0.3(0.28) | 152 | 0.22(0.19, 0.26) | 0.23(0.2, 0.27) | 404.45 | -2.1(-2.33) | 0.23(0.2) |
| endocrine disorders | 33 | 0.2(0.14, 0.28) | 0.2(0.14, 0.28) | 107.98 | -2.34(-2.82) | 0.2(0.15) | 5 | 0.16(0.07, 0.39) | 0.16(0.07, 0.39) | 21.48 | -2.61(-3.77) | 0.16(0.08) |
| general disorders and administration site conditions | 2813 | 0.2(0.2, 0.21) | 0.24(0.23, 0.25) | 8291.15 | -2.06(-2.11) | 0.24(0.23) | 617 | 0.25(0.23, 0.27) | 0.29(0.27, 0.31) | 1333.71 | -1.8(-1.91) | 0.29(0.27) |
| metabolism and nutrition disorders | 396 | 0.28(0.25, 0.31) | 0.28(0.25, 0.31) | 742.44 | -1.83(-1.97) | 0.28(0.26) | 81 | 0.31(0.25, 0.39) | 0.31(0.25, 0.38) | 123.72 | -1.67(-1.98) | 0.31(0.26) |
| infections and infestations | 1181 | 0.32(0.31, 0.34) | 0.34(0.32, 0.36) | 1637.1 | -1.57(-1.65) | 0.34(0.32) | 162 | 0.24(0.21, 0.28) | 0.25(0.21, 0.29) | 380.8 | -1.99(-2.21) | 0.25(0.22) |
| neoplasms benign, malignant and unspecified (incl cysts and polyps) | 346 | 0.18(0.16, 0.2) | 0.19(0.17, 0.21) | 1264.59 | -2.42(-2.57) | 0.19(0.17) | 43 | 0.12(0.09, 0.17) | 0.13(0.1, 0.17) | 266.83 | -2.98(-3.41) | 0.13(0.1) |
| psychiatric disorders | 481 | 0.12(0.11, 0.13) | 0.13(0.12, 0.14) | 3064.34 | -2.97(-3.1) | 0.13(0.12) | 77 | 0.11(0.08, 0.13) | 0.11(0.09, 0.14) | 581.57 | -3.17(-3.49) | 0.11(0.09) |
| immune system disorders | 70 | 0.09(0.07, 0.12) | 0.09(0.07, 0.11) | 619.93 | -3.41(-3.75) | 0.09(0.08) | 9 | 0.07(0.03, 0.13) | 0.07(0.04, 0.13) | 120.56 | -3.92(-4.82) | 0.07(0.04) |
| pregnancy, puerperium and perinatal conditions | 21 | 0.07(0.05, 0.11) | 0.08(0.05, 0.12) | 240.25 | -3.73(-4.34) | 0.08(0.05) |  |  |  |  |  |  |

Supplement Table 2 Subgroup Analysis of Adverse Events.

Supplement Table 2A Rivaroxaban Only and Rivaroxaban + Clopidogrel

| Subgroup | Rivaroxaban Only | | | | | | Rivaroxaban + Clopidogrel | | | | | |
| --- | --- | --- | --- | --- | --- | --- | --- | --- | --- | --- | --- | --- |
|  | Case Reports | ROR (95% CI) | PRR (95% CI) | chisq | IC(IC025) | EBGM(EBGM05) | Case Reports | ROR (95% CI) | PRR (95% CI) | chisq | IC(IC025) | EBGM(EBGM05) |
| splenic haematoma | 45 | 46.45(33.48, 64.43) | 46.44(33.28, 64.8) | 1595.17 | 5.22(4.76) | 37.23(28.31) |  |  |  |  |  |  |
| atrial thrombosis | 444 | 61.18(54.94, 68.12) | 61.07(55.37, 67.36) | 19661.67 | 5.52(5.37) | 46.02(42.06) |  |  |  |  |  |  |
| pericardial haemorrhage | 367 | 46.78(41.71, 52.47) | 46.71(41.53, 52.54) | 13074.98 | 5.23(5.06) | 37.4(33.98) |  |  |  |  |  |  |
| ventricular asystole |  |  |  |  |  |  | 4 | 104.2(38.49, 282.11) | 104.17(38.34, 283.05) | 395.86 | 6.66(5.37) | 100.92(43.86) |
| pericarditis constrictive |  |  |  |  |  |  |  |  |  |  |  |  |
| haemorrhagic arteriovenous malformation | 581 | 325.31(284.07, 372.54) | 324.54(282.93, 372.27) | 67489.52 | 6.88(6.73) | 117.52(104.92) | 76 | 294.2(232.48, 372.31) | 292.61(231.28, 370.2) | 20238.68 | 8.07(7.73) | 268.21(220.25) |
| adrenal haemorrhage | 99 | 57.25(45.68, 71.75) | 57.23(45.24, 72.41) | 4164.43 | 5.45(5.14) | 43.81(36.27) |  |  |  |  |  |  |
| thyroid pain |  |  |  |  |  |  | 5 | 125.18(51.22, 305.93) | 125.13(50.79, 308.26) | 592.55 | 6.91(5.73) | 120.46(57.03) |
| lacrimal haemorrhage |  |  |  |  |  |  | 3 | 196.17(61.14, 629.43) | 196.12(61.7, 623.36) | 548.79 | 7.53(6.06) | 184.87(69.7) |
| macular ischaemia |  |  |  |  |  |  | 5 | 149.74(61.07, 367.18) | 149.69(60.76, 368.77) | 705.52 | 7.16(5.98) | 143.05(67.54) |
| ocular retrobulbar haemorrhage |  |  |  |  |  |  | 4 | 122.07(44.97, 331.36) | 122.03(44.91, 331.58) | 462.54 | 6.88(5.58) | 117.59(50.99) |
| diverticulum intestinal haemorrhagic | 749 | 113.79(103.86, 124.66) | 113.44(102.85, 125.12) | 51497.58 | 6.14(6.02) | 70.36(65.19) | 66 | 112.45(87.92, 143.81) | 111.92(88.46, 141.6) | 7010.84 | 6.76(6.41) | 108.18(88.05) |
| gastrointestinal vascular malformation haemorrhagic | 126 | 109.13(87.52, 136.08) | 109.08(87.92, 135.33) | 8448.05 | 6.1(5.81) | 68.67(57.09) | 9 | 87.95(45.35, 170.59) | 87.9(45.14, 171.16) | 752.53 | 6.42(5.51) | 85.58(49.16) |
| chronic gastrointestinal bleeding | 71 | 81.59(61.68, 107.93) | 81.56(61.99, 107.31) | 3905.87 | 5.83(5.44) | 56.69(44.86) |  |  |  |  |  |  |
| mesenteric haemorrhage | 20 | 68.93(41.21, 115.3) | 68.93(41.41, 114.74) | 972.04 | 5.65(4.95) | 50.32(32.72) |  |  |  |  |  |  |
| haemorrhagic erosive gastritis | 80 | 66.75(51.67, 86.23) | 66.72(51.71, 86.08) | 3793.48 | 5.62(5.26) | 49.14(39.66) | 9 | 99.48(51.23, 193.16) | 99.41(51.05, 193.57) | 850.43 | 6.59(5.68) | 96.45(55.36) |
| lower gastrointestinal haemorrhage | 1659 | 64.33(60.83, 68.04) | 63.9(60.25, 67.77) | 76111.23 | 5.57(5.49) | 47.6(45.42) |  |  |  |  |  |  |
| gastrointestinal haemorrhage | 16208 | 58.76(57.71, 59.83) | 54.94(53.87, 56.03) | 660937.6 | 5.41(5.38) | 42.47(41.83) |  |  |  |  |  |  |
| gastrointestinal polyp haemorrhage | 118 | 58.44(47.5, 71.9) | 58.41(47.08, 72.46) | 5045.25 | 5.48(5.19) | 44.5(37.41) |  |  |  |  |  |  |
| dieulafoy's vascular malformation | 65 | 56.28(42.62, 74.33) | 56.27(42.77, 74.04) | 2697.66 | 5.43(5.05) | 43.25(34.27) | 11 | 133.07(72.79, 243.28) | 132.97(72.42, 244.14) | 1383.34 | 7(6.16) | 127.71(77.09) |
| upper gastrointestinal haemorrhage | 3091 | 53.07(50.98, 55.25) | 52.41(50.4, 54.51) | 121167 | 5.36(5.3) | 40.95(39.6) |  |  |  |  |  |  |
| oesophagitis haemorrhagic | 48 | 47.4(34.51, 65.12) | 47.39(34.63, 64.85) | 1730.8 | 5.24(4.8) | 37.84(29.01) |  |  |  |  |  |  |
| gastroduodenal haemorrhage |  |  |  |  |  |  | 6 | 202.4(88.68, 461.96) | 202.32(88.82, 460.84) | 1130.53 | 7.57(6.47) | 190.36(95.43) |
| duodenitis haemorrhagic |  |  |  |  |  |  | 4 | 105.93(39.12, 286.85) | 105.9(38.97, 287.75) | 402.32 | 6.68(5.39) | 102.54(44.55) |
| gastritis haemorrhagic |  |  |  |  |  |  |  |  |  |  |  |  |
| peptic ulcer haemorrhage |  |  |  |  |  |  |  |  |  |  |  |  |
| proctitis haemorrhagic |  |  |  |  |  |  |  |  |  |  |  |  |
| small intestinal haemorrhage |  |  |  |  |  |  |  |  |  |  |  |  |
| gastric ulcer haemorrhage |  |  |  |  |  |  |  |  |  |  |  |  |
| rectal ulcer haemorrhage |  |  |  |  |  |  |  |  |  |  |  |  |
| vascular stent thrombosis |  |  |  |  |  |  | 61 | 115.78(89.63, 149.56) | 115.28(89.35, 148.73) | 6670.99 | 6.8(6.43) | 111.31(89.85) |
| insulin autoimmune syndrome |  |  |  |  |  |  | 10 | 149.8(79.43, 282.48) | 149.69(79.95, 280.27) | 1411.03 | 7.16(6.29) | 143.05(84.14) |
| diverticulitis intestinal haemorrhagic |  |  |  |  |  |  |  |  |  |  |  |  |
| anastomotic ulcer haemorrhage | 48 | 115.39(80.39, 165.61) | 115.36(81.07, 164.16) | 3335.35 | 6.15(5.68) | 71.09(52.54) |  |  |  |  |  |  |
| cerebral ventricle collapse | 21 | 81.62(48.79, 136.53) | 81.61(49.03, 135.85) | 1155.75 | 5.83(5.13) | 56.72(36.88) |  |  |  |  |  |  |
| haemodilution |  |  |  |  |  |  | 7 | 329.92(151.51, 718.41) | 329.76(150.56, 722.25) | 2080.19 | 8.22(7.17) | 299.07(155.95) |
| wound haematoma |  |  |  |  |  |  | 8 | 215.47(105.3, 440.94) | 215.35(104.28, 444.73) | 1599.34 | 7.66(6.68) | 201.85(110.87) |
| subarachnoid haematoma |  |  |  |  |  |  | 4 | 113.43(41.84, 307.5) | 113.39(41.73, 308.1) | 430.37 | 6.78(5.48) | 109.55(47.55) |
| duplicate therapy error |  |  |  |  |  |  | 7 | 103.39(48.7, 219.49) | 103.33(49.06, 217.62) | 687.24 | 6.65(5.63) | 100.14(53.34) |
| anastomotic haemorrhage |  |  |  |  |  |  | 4 | 89.01(32.95, 240.42) | 88.98(32.75, 241.78) | 338.57 | 6.44(5.15) | 86.6(37.71) |
| radiation associated haemorrhage |  |  |  |  |  |  |  |  |  |  |  |  |
| post procedural haematuria |  |  |  |  |  |  |  |  |  |  |  |  |
| haematuria traumatic |  |  |  |  |  |  |  |  |  |  |  |  |
| open globe injury |  |  |  |  |  |  |  |  |  |  |  |  |
| coagulation factor x level increased | 14 | 182.67(87.08, 383.18) | 182.66(86.73, 384.69) | 1264.65 | 6.52(5.62) | 91.83(49.41) |  |  |  |  |  |  |
| anti factor x antibody positive | 6 | 156.57(52.62, 465.89) | 156.57(52.24, 469.23) | 499.38 | 6.41(5.1) | 84.77(34.04) |  |  |  |  |  |  |
| cha2ds2-vasc annual stroke risk high | 4 | 146.13(39.24, 544.2) | 146.13(39.3, 543.32) | 320.3 | 6.35(4.8) | 81.63(27.17) |  |  |  |  |  |  |
| fractional exhaled nitric oxide increased |  |  |  |  |  |  | 11 | 329.57(177.15, 613.16) | 329.32(175.88, 616.61) | 3264.89 | 8.22(7.37) | 298.71(177.69) |
| cardiovascular evaluation |  |  |  |  |  |  |  |  |  |  |  |  |
| chest wall haematoma |  |  |  |  |  |  | 6 | 88.2(39.19, 198.52) | 88.17(39.47, 196.93) | 503.22 | 6.42(5.34) | 85.83(43.53) |
| bursal haematoma |  |  |  |  |  |  |  |  |  |  |  |  |
| cerebral ventricular rupture | 54 | 83.61(60.59, 115.37) | 83.59(61.09, 114.38) | 3023.07 | 5.85(5.41) | 57.66(44.04) |  |  |  |  |  |  |
| basal ganglia haemorrhage | 218 | 80.84(68.92, 94.82) | 80.77(69.05, 94.48) | 11908.88 | 5.82(5.6) | 56.31(49.28) |  |  |  |  |  |  |
| embolic cerebral infarction | 143 | 68.42(56.45, 82.91) | 68.38(56.21, 83.19) | 6908.17 | 5.64(5.38) | 50.03(42.59) |  |  |  |  |  |  |
| thalamus haemorrhage | 191 | 66.25(56.14, 78.18) | 66.2(56.59, 77.44) | 9002.65 | 5.61(5.38) | 48.86(42.54) |  |  |  |  |  |  |
| haemorrhagic stroke | 1411 | 53.22(50.15, 56.48) | 52.92(49.9, 56.12) | 55738.84 | 5.37(5.28) | 41.26(39.26) |  |  |  |  |  |  |
| hemiataxia |  |  |  |  |  |  | 6 | 801.18(327.45, 1960.3) | 800.84(325.08, 1972.9) | 3834.44 | 9.32(8.14) | 640.87(303.13) |
| paresis cranial nerve |  |  |  |  |  |  | 5 | 314.17(125.37, 787.27) | 314.05(125, 788.99) | 1420.98 | 8.16(6.95) | 286.1(132.65) |
| spinal epidural haemorrhage |  |  |  |  |  |  | 5 | 296.71(118.68, 741.84) | 296.61(118.06, 745.17) | 1348.22 | 8.09(6.87) | 271.56(126.14) |
| amyloid related imaging abnormality-microhaemorrhages and haemosiderin deposits |  |  |  |  |  |  | 7 | 180.92(84.48, 387.49) | 180.83(84.2, 388.37) | 1184.99 | 7.42(6.39) | 171.23(90.53) |
| basilar artery thrombosis |  |  |  |  |  |  | 6 | 133.53(59, 302.22) | 133.47(58.6, 304.01) | 757.33 | 7(5.91) | 128.17(64.71) |
| spinal cord haemorrhage |  |  |  |  |  |  | 10 | 102.74(54.73, 192.89) | 102.67(54.83, 192.24) | 975.55 | 6.64(5.77) | 99.51(58.75) |
| post-traumatic amnestic disorder |  |  |  |  |  |  | 9 | 686.87(334.29, 1411.32) | 686.43(332.39, 1417.58) | 5072.88 | 9.14(8.17) | 565.48(309.55) |
| renal haemorrhage | 351 | 49.09(43.63, 55.23) | 49.02(43.58, 55.14) | 13017.33 | 5.28(5.11) | 38.86(35.21) |  |  |  |  |  |  |
| ureteric haemorrhage |  |  |  |  |  |  |  |  |  |  |  |  |
| subcapsular renal haematoma |  |  |  |  |  |  |  |  |  |  |  |  |
| prostatic varices | 3 | 137(30.66, 612.12) | 136.99(30.89, 607.59) | 231.43 | 6.3(4.57) | 78.71(22.49) |  |  |  |  |  |  |
| prostatic haemorrhage |  |  |  |  |  |  |  |  |  |  |  |  |
| nasal septum haematoma |  |  |  |  |  |  |  |  |  |  |  |  |
| subgaleal haematoma | 50 | 87(62.12, 121.84) | 86.98(62.33, 121.37) | 2878.77 | 5.89(5.43) | 59.24(44.7) | 5 | 106.82(43.81, 260.42) | 106.78(44.2, 257.95) | 507.04 | 6.69(5.51) | 103.37(49.04) |
| internal haemorrhage | 2907 | 76.68(73.42, 80.08) | 75.78(72.87, 78.81) | 151649.2 | 5.75(5.69) | 53.85(51.93) |  |  |  |  |  |  |
| arterial haemorrhage |  |  |  |  |  |  | 26 | 99.69(67.45, 147.34) | 99.51(67.24, 147.27) | 2459.1 | 6.59(6.04) | 96.54(69.62) |

Supplement Table 2B Rivaroxaban + Aspirin and Rivaroxaban + Clopidogrel + Aspirin

| Subgroup | Rivaroxaban + Aspirin | | | | | | Rivaroxaban + Clopidogrel + Aspirin | | | | | |
| --- | --- | --- | --- | --- | --- | --- | --- | --- | --- | --- | --- | --- |
|  | Case Reports | ROR (95% CI) | PRR (95% CI) | chisq | IC(IC025) | EBGM(EBGM05) | Case Reports | ROR (95% CI) | PRR (95% CI) | chisq | IC(IC025) | EBGM(EBGM05) |
| splenic haematoma | 23 | 81.83(53.14, 126.02) | 81.8(53.15, 125.9) | 1645.61 | 6.2(5.59) | 73.43(51.17) |  |  |  |  |  |  |
| atrial thrombosis |  |  |  |  |  |  |  |  |  |  |  |  |
| pericardial haemorrhage |  |  |  |  |  |  |  |  |  |  |  |  |
| ventricular asystole |  |  |  |  |  |  | 4 | 125.83(46.48, 340.67) | 125.79(46.29, 341.8) | 479.59 | 6.93(5.64) | 121.86(52.96) |
| pericarditis constrictive |  |  |  |  |  |  | 7 | 104.2(49.17, 220.8) | 104.14(49.45, 219.32) | 696.29 | 6.66(5.65) | 101.43(54.11) |
| haemorrhagic arteriovenous malformation | 530 | 1000.74(876.83, 1142.17) | 992.4(865.17, 1138.34) | 218526.21 | 8.69(8.54) | 413.72(370.4) | 104 | 504.84(411.24, 619.74) | 500.33(411.28, 608.66) | 45891.7 | 8.79(8.5) | 443.14(373.27) |
| adrenal haemorrhage |  |  |  |  |  |  |  |  |  |  |  |  |
| thyroid pain |  |  |  |  |  |  |  |  |  |  |  |  |
| lacrimal haemorrhage |  |  |  |  |  |  |  |  |  |  |  |  |
| macular ischaemia |  |  |  |  |  |  | 6 | 219.05(96.22, 498.71) | 218.94(96.12, 498.7) | 1231.95 | 7.7(6.59) | 207.27(104.13) |
| ocular retrobulbar haemorrhage |  |  |  |  |  |  | 4 | 147.4(54.3, 400.14) | 147.35(54.23, 400.38) | 560.1 | 7.15(5.86) | 141.98(61.56) |
| diverticulum intestinal haemorrhagic | 525 | 262.01(237, 289.66) | 259.85(235.59, 286.6) | 99025.31 | 7.57(7.43) | 190.34(175.01) | 68 | 140.2(110, 178.69) | 139.39(110.18, 176.35) | 9018.17 | 7.07(6.72) | 134.57(109.85) |
| gastrointestinal vascular malformation haemorrhagic | 177 | 785.18(633.94, 972.49) | 782.99(631.14, 971.38) | 65631.81 | 8.54(8.28) | 372.27(311.25) | 27 | 337.67(227.77, 500.58) | 336.89(227.64, 498.58) | 8317.66 | 8.28(7.72) | 309.98(222.98) |
| chronic gastrointestinal bleeding | 66 | 285.14(214.25, 379.47) | 284.84(212.28, 382.19) | 13311.04 | 7.67(7.28) | 203.39(160.13) | 6 | 103.66(46.07, 233.25) | 103.61(46.39, 231.42) | 593.79 | 6.66(5.57) | 100.93(51.2) |
| mesenteric haemorrhage |  |  |  |  |  |  |  |  |  |  |  |  |
| haemorrhagic erosive gastritis | 69 | 212.57(162.41, 278.22) | 212.34(161.38, 279.38) | 11164.37 | 7.35(6.98) | 163.57(130.58) | 17 | 233.51(143.08, 381.1) | 233.18(142.85, 380.62) | 3706.63 | 7.78(7.09) | 219.97(146.01) |
| lower gastrointestinal haemorrhage | 1222 | 170.26(159.89, 181.3) | 167.01(157.47, 177.12) | 163171.49 | 7.08(6.99) | 135.31(128.38) | 167 | 105.11(90.04, 122.71) | 103.62(88.58, 121.21) | 16531.25 | 6.66(6.43) | 100.94(88.68) |
| gastrointestinal haemorrhage | 9342 | 127.44(124.49, 130.45) | 108.84(106.73, 110.99) | 866525.88 | 6.56(6.53) | 94.47(92.64) | 1685 | 111.24(105.58, 117.19) | 95.28(91.62, 99.09) | 153649.71 | 6.54(6.46) | 93.01(89.04) |
| gastrointestinal polyp haemorrhage | 85 | 149.86(118.58, 189.39) | 149.66(118.29, 189.34) | 10360.84 | 6.95(6.62) | 123.71(101.7) | 12 | 97.82(55.14, 173.52) | 97.72(55.35, 172.52) | 1120.43 | 6.57(5.78) | 95.33(59.01) |
| dieulafoy's vascular malformation | 61 | 201.01(151.24, 267.14) | 200.81(149.66, 269.44) | 9447.6 | 7.29(6.89) | 156.65(123.47) | 16 | 238.35(143.82, 395.02) | 238.03(142.99, 396.23) | 3557.62 | 7.81(7.1) | 224.29(146.97) |
| upper gastrointestinal haemorrhage | 2335 | 148.8(142.22, 155.67) | 143.36(137.85, 149.09) | 274583.81 | 6.9(6.84) | 119.38(114.96) | 421 | 125.65(113.84, 138.7) | 121.14(109.83, 133.61) | 48654.54 | 6.88(6.73) | 117.5(108.18) |
| oesophagitis haemorrhagic | 45 | 169.54(122.45, 234.73) | 169.42(121.41, 236.41) | 6079.02 | 7.1(6.64) | 136.89(104.27) |  |  |  |  |  |  |
| gastroduodenal haemorrhage |  |  |  |  |  |  | 6 | 244.42(107.09, 557.87) | 244.29(107.25, 556.44) | 1367.42 | 7.84(6.74) | 229.84(115.22) |
| duodenitis haemorrhagic | 29 | 213.91(141.2, 324.06) | 213.81(141.67, 322.69) | 4717.59 | 7.36(6.79) | 164.44(116.16) | 8 | 264.66(129.27, 541.82) | 264.48(128.07, 546.19) | 1965.45 | 7.95(6.98) | 247.61(135.96) |
| gastritis haemorrhagic | 188 | 138.87(118.75, 162.4) | 138.46(118.37, 161.97) | 21459.3 | 6.86(6.64) | 115.97(101.74) |  |  |  |  |  |  |
| peptic ulcer haemorrhage | 74 | 118.1(92.33, 151.07) | 117.97(91.44, 152.21) | 7356.12 | 6.66(6.31) | 101.26(82.4) |  |  |  |  |  |  |
| proctitis haemorrhagic | 6 | 92.33(39.43, 216.19) | 92.32(39.74, 214.45) | 479.45 | 6.35(5.22) | 81.78(40.13) |  |  |  |  |  |  |
| small intestinal haemorrhage | 177 | 87.79(75.08, 102.65) | 87.55(74.84, 102.41) | 13477.27 | 6.29(6.06) | 78.02(68.45) |  |  |  |  |  |  |
| gastric ulcer haemorrhage | 445 | 81.32(73.7, 89.73) | 80.76(73.22, 89.08) | 31466.94 | 6.18(6.04) | 72.59(66.86) |  |  |  |  |  |  |
| rectal ulcer haemorrhage |  |  |  |  |  |  | 5 | 100.77(41.46, 244.92) | 100.73(41.7, 243.34) | 481.16 | 6.62(5.45) | 98.2(46.71) |
| vascular stent thrombosis |  |  |  |  |  |  |  |  |  |  |  |  |
| insulin autoimmune syndrome |  |  |  |  |  |  |  |  |  |  |  |  |
| diverticulitis intestinal haemorrhagic | 38 | 96.81(68.97, 135.88) | 96.75(69.33, 135.01) | 3167.84 | 6.41(5.93) | 85.23(64.18) |  |  |  |  |  |  |
| anastomotic ulcer haemorrhage | 21 | 144.35(90.28, 230.82) | 144.31(90.16, 230.99) | 2482.46 | 6.91(6.25) | 120.04(81.05) | 4 | 128.98(47.62, 349.32) | 128.93(47.45, 350.33) | 491.38 | 6.96(5.67) | 124.81(54.22) |
| cerebral ventricle collapse |  |  |  |  |  |  |  |  |  |  |  |  |
| haemodilution |  |  |  |  |  |  | 7 | 398.41(182.96, 867.58) | 398.17(181.79, 872.08) | 2514.4 | 8.5(7.44) | 361.1(188.29) |
| wound haematoma |  |  |  |  |  |  |  |  |  |  |  |  |
| subarachnoid haematoma |  |  |  |  |  |  | 5 | 172.75(70.51, 423.23) | 172.68(70.09, 425.4) | 816.95 | 7.37(6.19) | 165.34(78.12) |
| duplicate therapy error |  |  |  |  |  |  |  |  |  |  |  |  |
| anastomotic haemorrhage |  |  |  |  |  |  | 6 | 163.52(72.23, 370.19) | 163.44(71.75, 372.28) | 929.38 | 7.29(6.2) | 156.85(79.17) |
| radiation associated haemorrhage | 6 | 121.35(51.04, 288.51) | 121.34(51.22, 287.43) | 611.27 | 6.7(5.54) | 103.73(50.25) |  |  |  |  |  |  |
| post procedural haematuria | 16 | 88.5(52.62, 148.82) | 88.47(52.12, 150.18) | 1230.01 | 6.3(5.57) | 78.75(50.98) |  |  |  |  |  |  |
| haematuria traumatic |  |  |  |  |  |  | 3 | 236.87(73.82, 760.07) | 236.81(74.5, 752.69) | 663.81 | 7.8(6.34) | 223.21(84.15) |
| open globe injury |  |  |  |  |  |  | 3 | 102.72(32.63, 323.32) | 102.69(32.95, 320.06) | 294.28 | 6.64(5.21) | 100.06(38.33) |
| coagulation factor x level increased |  |  |  |  |  |  |  |  |  |  |  |  |
| anti factor x antibody positive |  |  |  |  |  |  |  |  |  |  |  |  |
| cha2ds2-vasc annual stroke risk high |  |  |  |  |  |  |  |  |  |  |  |  |
| fractional exhaled nitric oxide increased |  |  |  |  |  |  | 11 | 398.02(213.93, 740.52) | 397.64(212.37, 744.53) | 3946.39 | 8.49(7.64) | 360.67(214.53) |
| cardiovascular evaluation | 3 | 111.76(33.07, 377.69) | 111.76(33.15, 376.74) | 284.39 | 6.59(5.06) | 96.65(34.89) |  |  |  |  |  |  |
| chest wall haematoma |  |  |  |  |  |  |  |  |  |  |  |  |
| bursal haematoma | 3 | 530.87(118.81, 2372.05) | 530.84(119.68, 2354.45) | 906.59 | 8.25(6.52) | 303.77(86.81) |  |  |  |  |  |  |
| cerebral ventricular rupture |  |  |  |  |  |  |  |  |  |  |  |  |
| basal ganglia haemorrhage |  |  |  |  |  |  |  |  |  |  |  |  |
| embolic cerebral infarction |  |  |  |  |  |  |  |  |  |  |  |  |
| thalamus haemorrhage |  |  |  |  |  |  |  |  |  |  |  |  |
| haemorrhagic stroke |  |  |  |  |  |  |  |  |  |  |  |  |
| hemiataxia |  |  |  |  |  |  | 7 | 1177.91(505.34, 2745.62) | 1177.21(506.79, 2734.5) | 6306.95 | 9.82(8.7) | 902.76(444.68) |
| paresis cranial nerve |  |  |  |  |  |  | 6 | 464.39(199.08, 1083.28) | 464.16(199.82, 1078.18) | 2475.85 | 8.7(7.56) | 414.53(204.06) |
| spinal epidural haemorrhage |  |  |  |  |  |  |  |  |  |  |  |  |
| amyloid related imaging abnormality-microhaemorrhages and haemosiderin deposits |  |  |  |  |  |  |  |  |  |  |  |  |
| basilar artery thrombosis |  |  |  |  |  |  | 7 | 189.45(88.7, 404.68) | 189.34(88.16, 406.65) | 1250.23 | 7.5(6.47) | 180.55(95.68) |
| spinal cord haemorrhage |  |  |  |  |  |  |  |  |  |  |  |  |
| post-traumatic amnestic disorder |  |  |  |  |  |  |  |  |  |  |  |  |
| renal haemorrhage | 170 | 81.02(69.12, 94.97) | 80.81(69.08, 94.53) | 12026.97 | 6.18(5.96) | 72.63(63.59) |  |  |  |  |  |  |
| ureteric haemorrhage | 6 | 106.18(45.02, 250.45) | 106.17(44.82, 251.5) | 543.54 | 6.53(5.38) | 92.45(45.09) |  |  |  |  |  |  |
| subcapsular renal haematoma |  |  |  |  |  |  | 3 | 95.14(30.26, 299.14) | 95.11(30.52, 296.44) | 272.67 | 6.54(5.1) | 92.86(35.61) |
| prostatic varices |  |  |  |  |  |  |  |  |  |  |  |  |
| prostatic haemorrhage | 28 | 84.73(57.25, 125.4) | 84.69(57.23, 125.34) | 2068.26 | 6.24(5.69) | 75.75(54.57) |  |  |  |  |  |  |
| nasal septum haematoma | 4 | 471.89(133.16, 1672.28) | 471.86(131.98, 1686.96) | 1127.67 | 8.15(6.62) | 283.52(98.36) |  |  |  |  |  |  |
| subgaleal haematoma | 25 | 136.17(88.75, 208.93) | 136.11(88.43, 209.49) | 2812.22 | 6.84(6.24) | 114.32(79.9) | 4 | 102.5(37.97, 276.69) | 102.46(37.71, 278.4) | 391.52 | 6.64(5.36) | 99.84(43.5) |
| internal haemorrhage | 1181 | 97.51(91.72, 103.67) | 95.72(90.25, 101.52) | 97527.89 | 6.4(6.31) | 84.43(80.21) |  |  |  |  |  |  |
| arterial haemorrhage |  |  |  |  |  |  | 22 | 101.37(66.36, 154.86) | 101.18(65.74, 155.73) | 2126.66 | 6.62(6.03) | 98.63(69.19) |
